# Supplementary material for: Ultra-responsive and highly sensitive 1D ZnO nanotubes for detecting perilous low levels of NO2 gas
Source: Royal Society of Chemistry journal article supplement (doi:10.1039/d3ma00962a), 2024-01-01
Supplement: d3ma00962a1.pdf [file d3ma00962a1.pdf]

## Supporting Information

### Ultra-Responsive and Highly Sensitive 1D ZnO Nanotubes for Detecting Perilous Low Levels of NO<sub>2</sub> Gas

Prasad Godse <sup>a</sup>, Sujit A Kadam<sup>\*b</sup>, T. M. Nimbalkar<sup>a</sup>, Y.M. Jadhav <sup>a</sup>, Yuvraj B Jadhao<sup>c</sup>

Yuan-Ron Ma<sup>b</sup>, V. B. Patil <sup>a\*</sup>

<sup>a</sup>Functional Materials Research Laboratory, School of Physical Sciences, Solapur University,  
Solapur, Maharashtra 413255, India

<sup>b</sup>Department of Physics, National Dong Hwa University, Hualien 97401, Taiwan

<sup>c</sup>Govt.College of Arts and Science, Chh.Sambhajinagar 431005

\*Email: [ksujit17@gmail.com](mailto:ksujit17@gmail.com), [drvbpatil@gmail.com/vbpatil@sus.ac.in](mailto:drvbpatil@gmail.com/vbpatil@sus.ac.in)

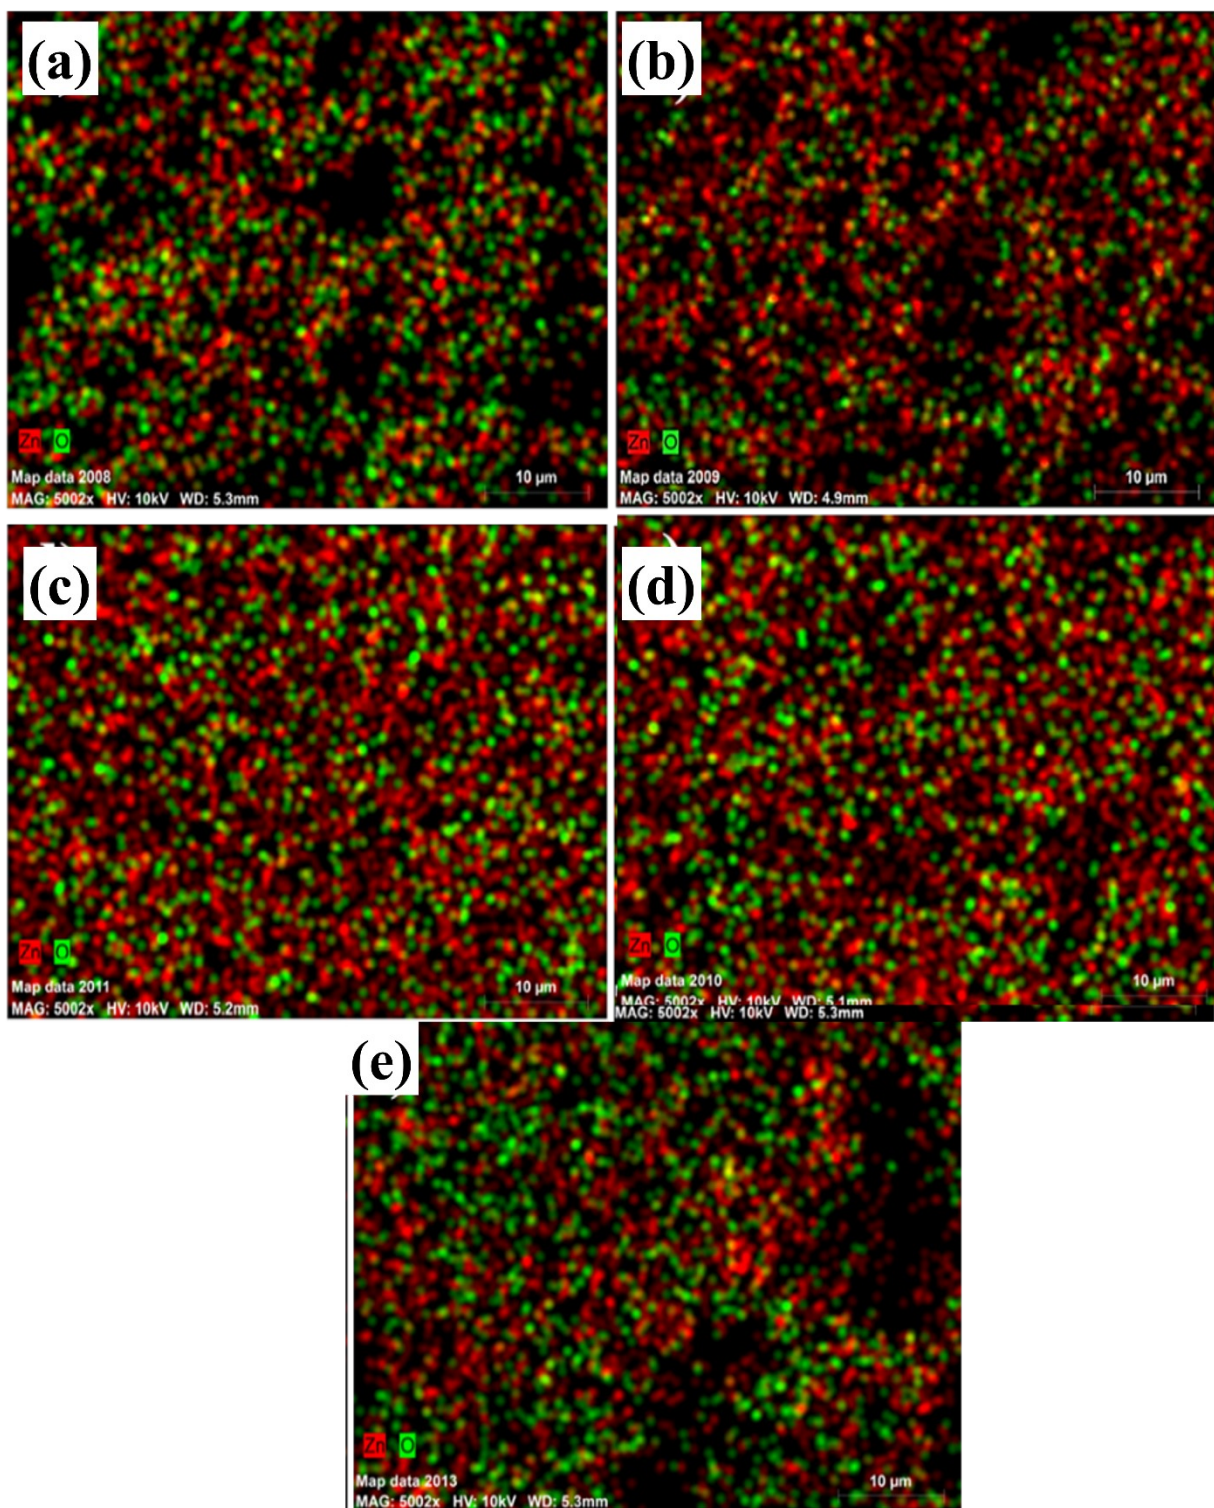

**Fig.S1.** Elemental mapping of ZnO nanostructures of (a) ZnO-100, (b) ZnO-200, (c) ZnO-300, (d) ZnO-400, and (e) ZnO-500 °C.

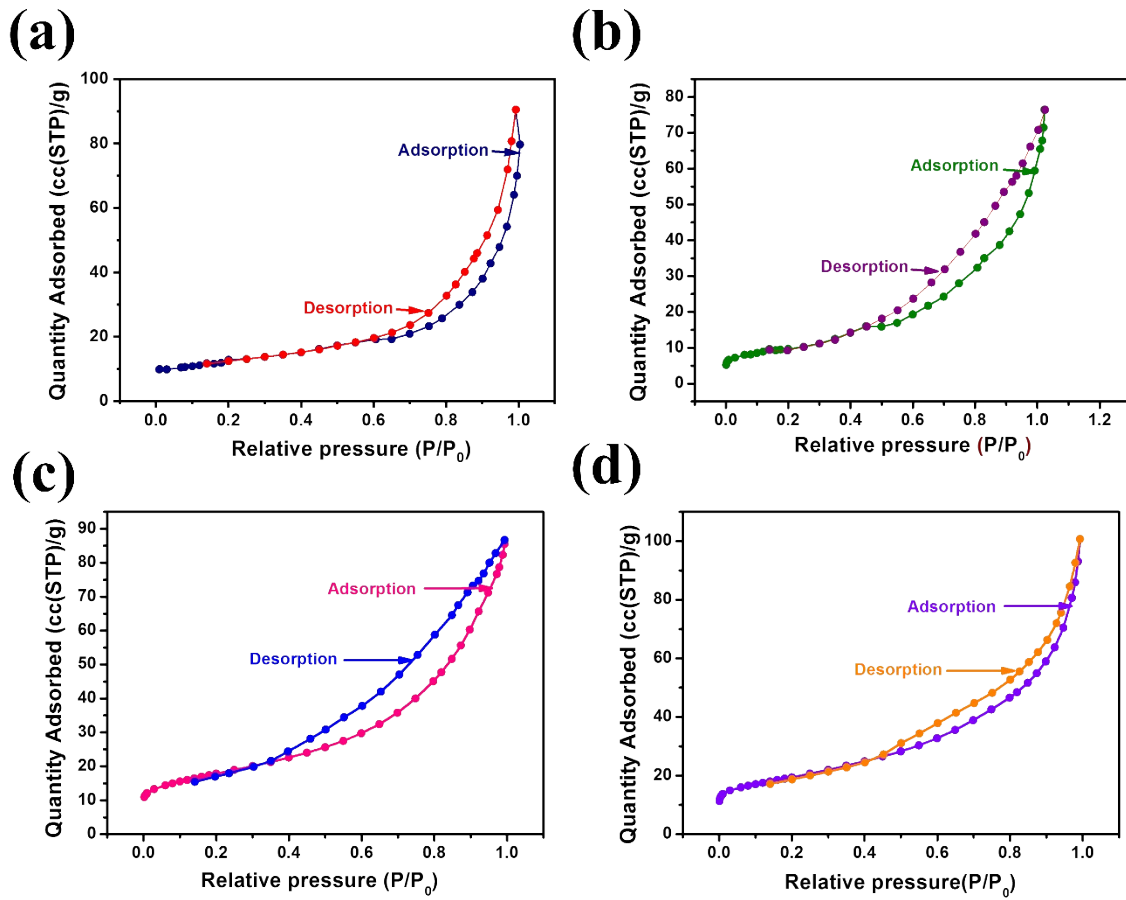

**Fig. S2.** BET study: Nitrogen adsorption - desorption isotherm of (a) ZnO-300, (b) ZnO-400, (c) ZnO-500 and (d) ZnO-600 nanostructures.

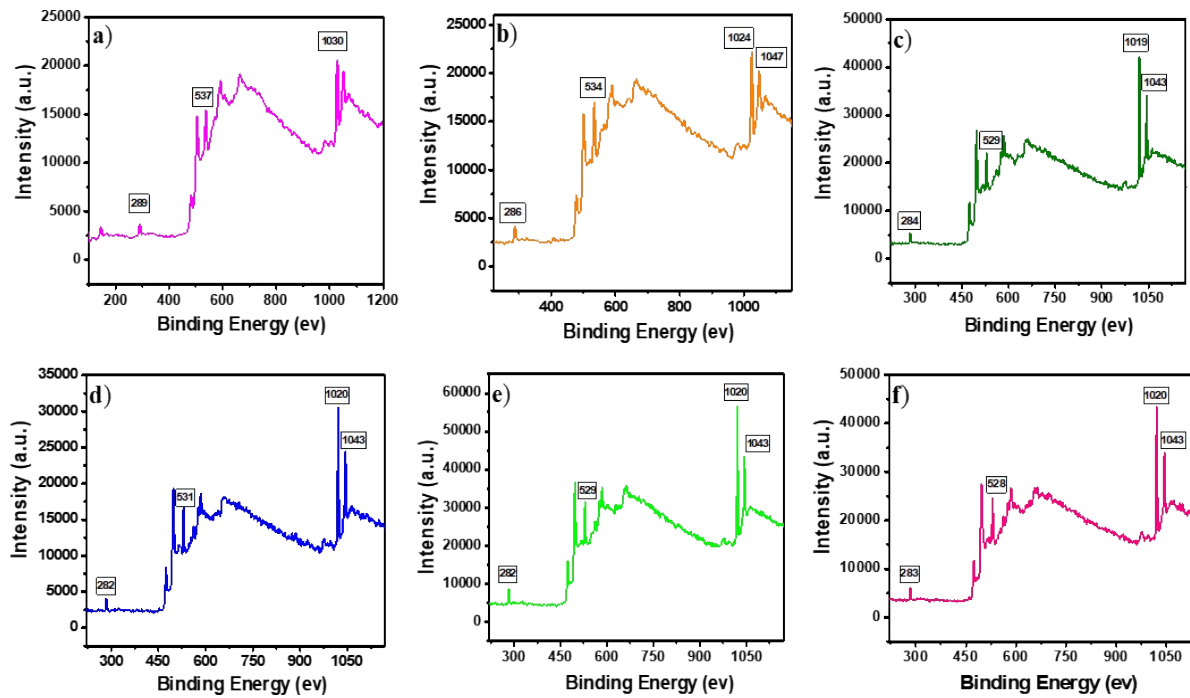

**Fig. S3.** Wide region survey spectrum of ZnO nanostructures of (a) ZnO-100, (b) ZnO-200, (c) ZnO-300, (d) ZnO-400, (e) ZnO-500, and (f) ZnO-600.

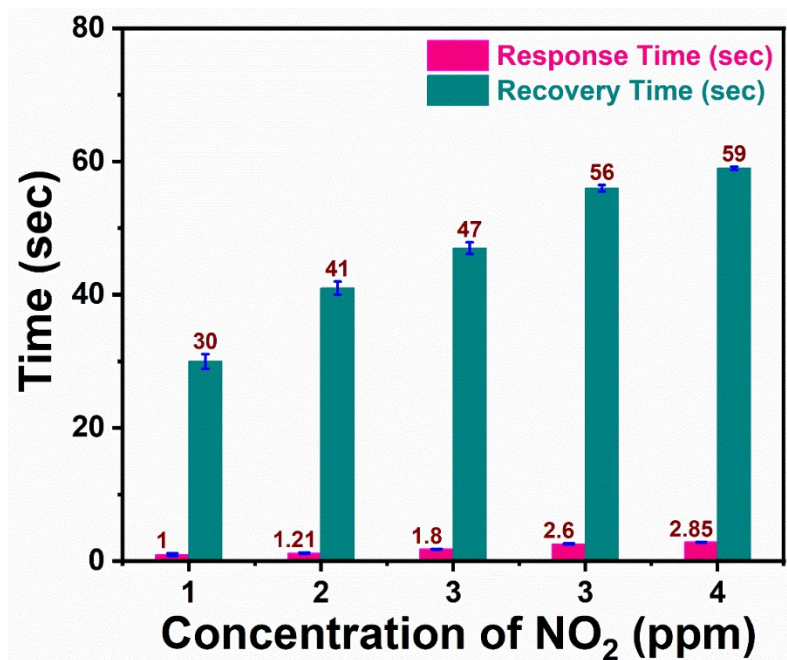

**Fig. S4.** Response-recovery time versus different concentration of NO<sub>2</sub>.

**Table T1:** Microstructural parameter of 1D ZnO nanostructure at ZnO-100 to ZnO-600 °C

| <b>Sr. No.</b> | <b>Temp.<br/>(°C)</b> | <b>Microstrain</b> | <b>Stacking fault<br/>(SF)</b> |
|----------------|-----------------------|--------------------|--------------------------------|
| 1              | ZnO-100               | 0.0584             | 0.1183                         |
| 2              | ZnO-200               | 0.0794             | 0.1612                         |
| 3              | ZnO-300               | 0.0828             | 0.1681                         |
| 4              | ZnO-400               | 0.0844             | 0.1714                         |
| 5              | ZnO-500               | 0.0913             | 0.1853                         |
| 6              | ZnO-600               | 0.0923             | 0.1874                         |
